# Supplementary material for: Exploration of the Molecular Mechanism of Polygonati Rhizoma in the Treatment of Osteoporosis Based on Network Pharmacology and Molecular Docking
Source: Front Endocrinol (Lausanne). 2022 Jan 5;12:815891. doi: 10.3389/fendo.2021.815891 (PMC8766719; doi:10.3389/fendo.2021.815891)
Supplement: Supplementary file 1 [file Table_1.xlsx]

## Sheet: Sheet1
Supplement Table 1. The summary of putative targets of PR
Gene symbol	Uniprot ID	Gene name	Database
PTGS1	P23219	Prostaglandin G/H synthase 1	Uniprot
ESR1	P03372	Estrogen receptor	Uniprot
PTGS2	P35354	Prostaglandin G/H synthase 2	Uniprot
RXRA	P19793	Retinoic acid receptor RXR-alpha	Uniprot
ADRB2	P07550	Beta-2 adrenergic receptor	Uniprot
HSP90AB1	P08238	Heat shock protein HSP 90	Uniprot
PIK3CG	P48736	Phosphatidylinositol-4,5-bisphosphate 3-kinase catalytic subunit, gamma isoform	Uniprot
MAOB	P27338	Amine oxidase [flavin-containing] B	Uniprot
SLC6A4	P31645	Sodium-dependent serotonin transporter	Uniprot
PKIA	P61925	cAMP-dependent protein kinase inhibitor alpha	Uniprot
AR	P10275	Androgen receptor	Uniprot
DPP4	P27487	Dipeptidyl peptidase IV	Uniprot
PDE3A	Q14432	CGMP-inhibited 3',5'-cyclic phosphodiesterase A	Uniprot
PRSS1	P07477	Trypsin-1	Uniprot
NCOA1	Q15788	Nuclear receptor coactivator 1	Uniprot
NCOA2	Q15596	Nuclear receptor coactivator 2	Uniprot
RELA	Q04206	Transcription factor p65	Uniprot
AKT1	P31749	RAC-alpha serine/threonine-protein kinase	Uniprot
VEGFA	P15692	Vascular endothelial growth factor A	Uniprot
BCL2	P10415	Apoptosis regulator Bcl-2	Uniprot
FOS	P01100	Proto-oncogene c-Fos	Uniprot
BAX	Q07812	Apoptosis regulator BAX	Uniprot
MMP9	P14780	Matrix metalloproteinase-9	Uniprot
CASP3	P42574	Caspase-3	Uniprot
TP53	P04637	Cellular tumor antigen p53	Uniprot
HIF1A	Q16665	Hypoxia-inducible factor 1-alpha	Uniprot
FOSL1	P15407	Fos-related antigen 1	Uniprot
FOSL2	P15408	Fos-related antigen 2	Uniprot
CDK1	P06493	Cell division control protein 2 homolog	Uniprot
CCNB1	P14635	G2/mitotic-specific cyclin-B1	Uniprot
MPO	P05164	Myeloperoxidase	Uniprot
AHR	P35869	Aryl hydrocarbon receptor	Uniprot
IGF2	P01344	Insulin-like growth factor II	Uniprot
ALOX12	P18054	Arachidonate 12-lipoxygenase, 12S-type	Uniprot
NFATC2	Q13469	Nuclear factor of activated T-cells, cytoplasmic 1	Uniprot
TDRD7	Q8NHU6	Tudor domain-containing protein 7	Uniprot
EGLN1	Q9GZT9	Egl nine homolog 1	Uniprot
NOX5	Q96PH1	NADPH oxidase 5	Uniprot
FABP5	Q01469	Fatty acid-binding protein, epidermal	Uniprot
APOD	P05090	Apolipoprotein D	Uniprot
NOS2	P35228	Nitric oxide synthase, inducible	Uniprot
PPARG	P37231	Peroxisome proliferator activated receptor gamma	Uniprot
ESR2	Q92731	Estrogen receptor beta	Uniprot
MAPK14	Q16539	Mitogen-activated protein kinase 14	Uniprot
GSK3B	P49841	Glycogen synthase kinase-3 beta	Uniprot
CDK2	P24941	Cell division protein kinase 2	Uniprot
CHEK1	O14757	Serine/threonine-protein kinase Chk1	Uniprot
PIM1	P11309	Proto-oncogene serine/threonine-protein kinase Pim-1	Uniprot
CCNA2	P20248	Cyclin-A2	Uniprot
PGR	P06401	Progesterone receptor	Uniprot
KCNH2	Q12809	Potassium voltage-gated channel subfamily H member 2	Uniprot
DRD1	P21728	Dopamine D1 receptor	Uniprot
CHRM3	P20309	Muscarinic acetylcholine receptor M3	Uniprot
CHRM1	P11229	Muscarinic acetylcholine receptor M1	Uniprot
SCN5A	Q14524	Sodium channel protein type 5 subunit alpha	Uniprot
GABRA2	P47869	Gamma-aminobutyric-acid receptor alpha-2 subunit	Uniprot
CHRM4	P08173	Muscarinic acetylcholine receptor M4	Uniprot
HTR2A	P28223	5-hydroxytryptamine 2A receptor	Uniprot
GABRA5	P31644	Gamma-aminobutyric-acid receptor alpha-5 subunit	Uniprot
ADRA1A	P35348	Alpha-1A adrenergic receptor	Uniprot
GABRA3	P34903	Gamma-aminobutyric-acid receptor alpha-3 subunit	Uniprot
CHRM2	P08172	Muscarinic acetylcholine receptor M2	Uniprot
ADRA1B	P35368	Alpha-1B adrenergic receptor	Uniprot
CHRNA2	Q15822	Neuronal acetylcholine receptor subunit alpha-2	Uniprot
OPRM1	P35372	Mu-type opioid receptor	Uniprot
GABRA1	P14867	Gamma-aminobutyric acid receptor subunit alpha-1	Uniprot
CHRNA7	P36544	Neuronal acetylcholine receptor protein, alpha-7 chain	Uniprot
CASP9	P55211	Caspase-9	Uniprot
CASP8	Q14790	Caspase-8	Uniprot
JUN	P05412	Transcription factor AP-1	Uniprot
PRKCA	P17252	Protein kinase C alpha type	Uniprot
TGFB1	P01137	Transforming growth factor beta-1	Uniprot
PON1	P27169	Serum paraoxonase/arylesterase 1	Uniprot
MAP2	P11137	Microtubule-associated protein 2	Uniprot
NR3C2	P08235	Mineralocorticoid receptor	Uniprot
CDKN1A	P38936	Cyclin-dependent kinase inhibitor 1	Uniprot
FASN	P49327	Fatty acid synthase	Uniprot
SOD1	P00441	Superoxide dismutase [Cu-Zn]	Uniprot
CAT	P04040	Catalase	Uniprot
NR1I2	O75469	Nuclear receptor subfamily 1 group I member 2	Uniprot
PLA2G4A	P47712	Cytosolic phospholipase A2	Uniprot
MTOR	P42345	Canalicular multispecific organic anion transporter 1	Uniprot
TOP2A	P11388	Serine/threonine-protein kinase mTOR	Uniprot
ABCC2	Q92887	DNA topoisomerase II	Uniprot
